# Supplementary material
Source: PubMed Central journal article supplement (PMC5155344)
Supplement: supp_tpc.16.00470_TPC2016-00470-RAR1_Supplemental_Data.pdf [file supp_tpc.16.00470_TPC2016-00470-RAR1_Supplemental_Data.pdf]

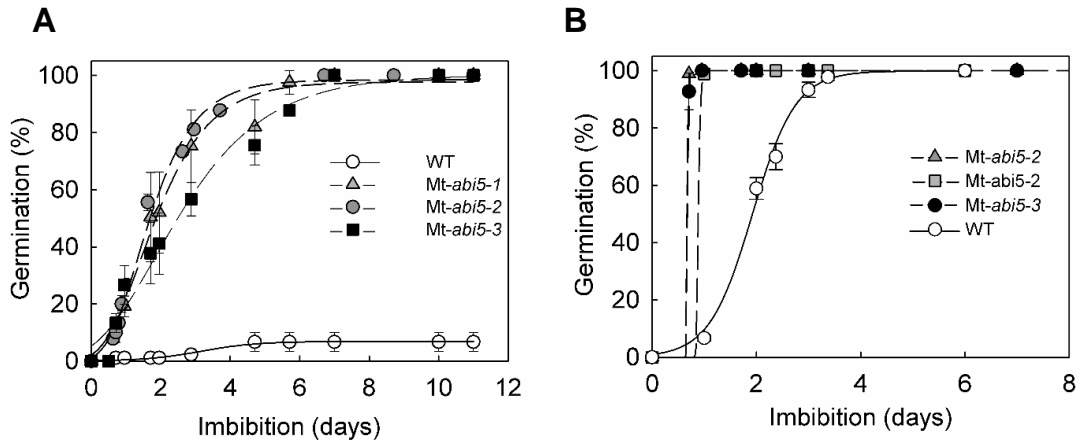

**Supplemental Figure 1. Germination of *Mt-abi5* seeds is insensitive to ABA during imbibition in the dark.**

A) Percentages of germination of wild-type (WT) and *Mt-abi5* seeds in the presence of 10 μM ABA and B) in the presence of 0.005% (v:v) methanol (control). Prior to imbibition, seeds were after-ripened for 30 d and scarified. Data represent the mean of 3 biological replicates of 30 seeds pooled from 20 plants (± SE).

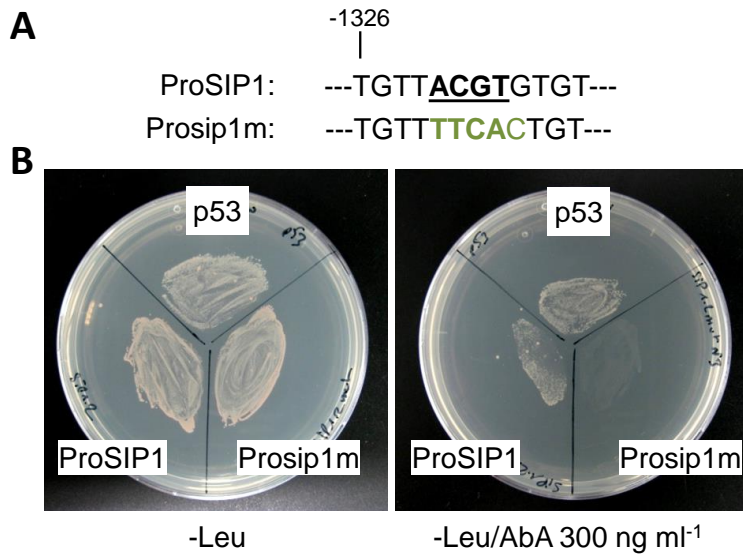

**Supplemental Figure 2: Yeast one-hybrid binding assays of ABI5 to the ABRE in the promoter region of Mt-SIP1.** A) Sequence of the -1326 bp region surrounding the ABRE (bold, underlined) used for the binding assay of the SIP1 promoter (ProSIP1) and its mutated version (Prosip1m, indicated in green). B) Binding assay using indicated baits. p53 sequence containing a p53 binding motif was used as a positive control (p53) whereas the mutated version (Prosip1m) was used as negative control (Prosip1m).

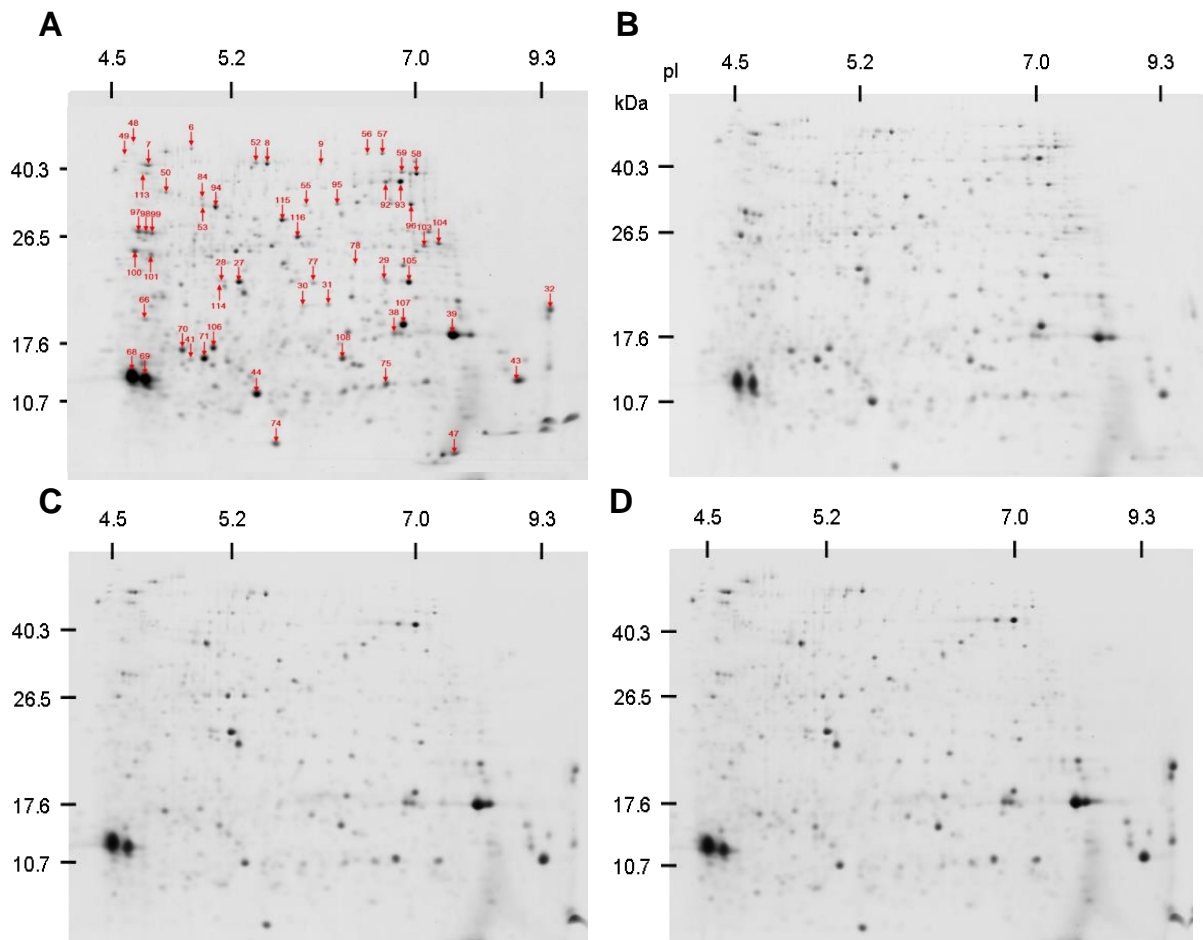

**Supplemental Figure 3. Two dimensional electrophoresis gels of the heat-stable proteome of *M. truncatula* seeds.**

A) Reference map of the heat-stable proteome of mature seeds, genotype R-108. B-D) Representative gels of the heat-stable proteome of mature wild-type (B), *Mt-abi5-1* (C) and *Mt-abi5-2* seeds (D). One hundred milligrams of the heat-stable proteins was separated by SDS-PAGE using 24 cm non linear immobilized pH gradient strips (3-10). pI and molecular mass (in kDa) are indicated. Numbers indicate the spots that were identified (see Supplementary table 1).

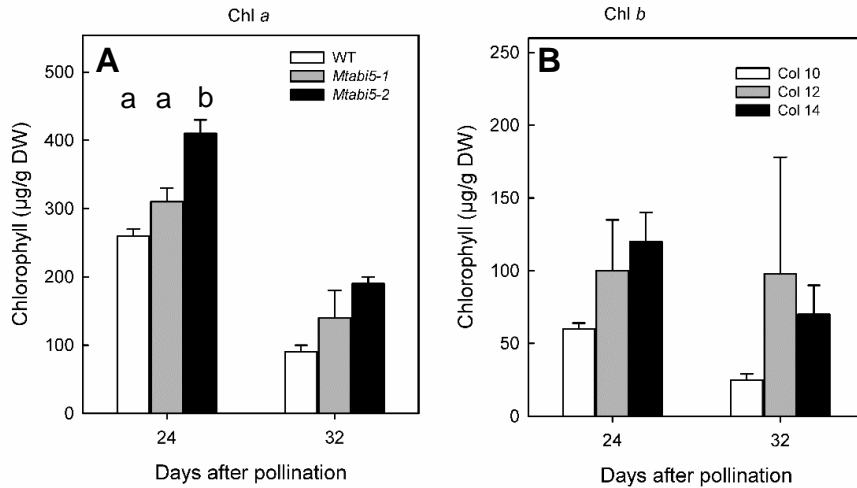

**Supplemental Figure 4. Chlorophyll contents in developing wild-type and *Mt-abi5* seeds.**

Data are the means ( $\pm$  SE) of 3 replicates of 30 seeds pooled from 20 plants. Letters indicate significant differences as assessed by ANOVA ( $P > 0.05$ , Supplemental Dataset 3) and post-hoc Student-Newman-Keuls test for multiple comparisons.

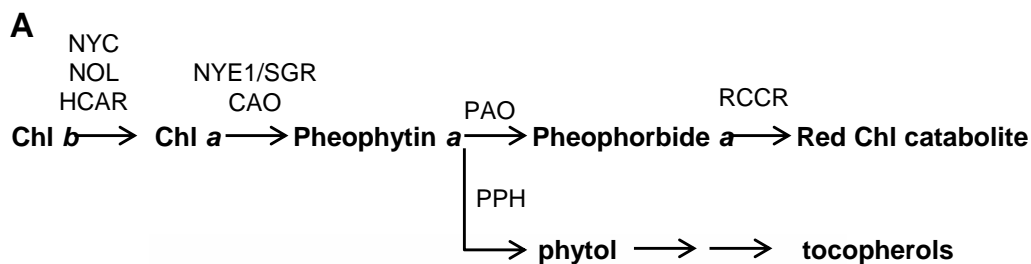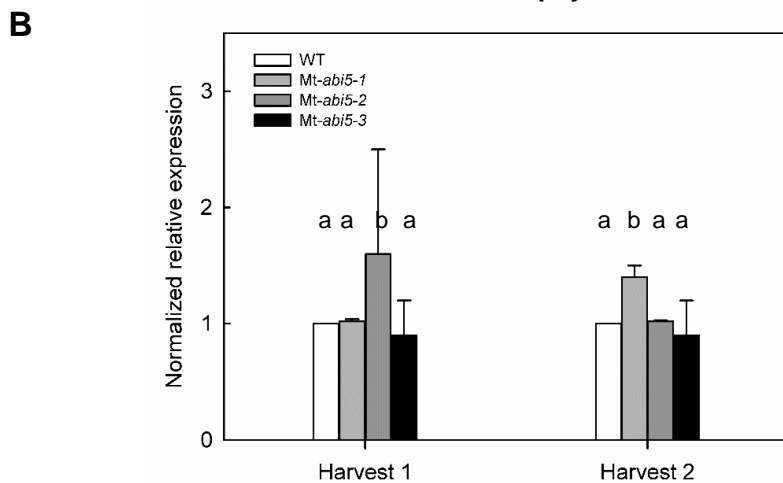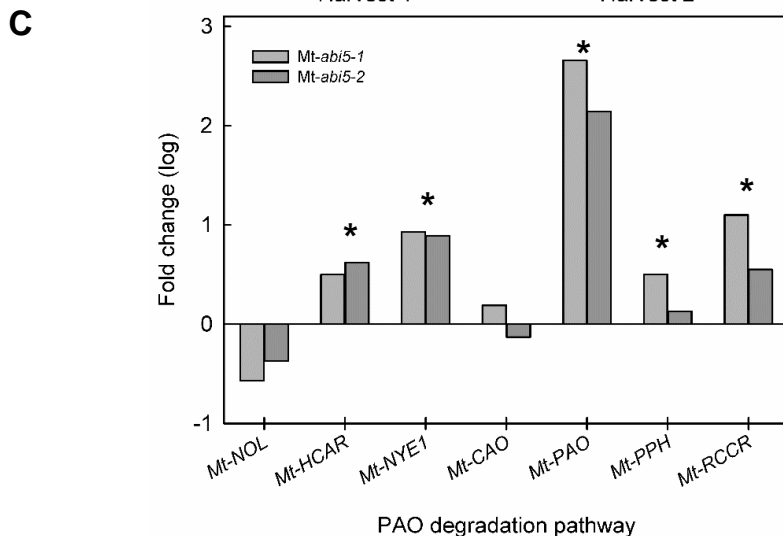

**Supplemental Figure 5. Expression of genes involved in the PAO degradation pathway in mature seeds of *Mt-abi5*.** A) PAO Chl breakdown pathway at the thylakoid membrane and associated enzymes (*HCAR*, 7-hydroxymethyl *Chl a* reductase, *NYC*, *NON YELLOW COLORING1*, *NOL*, *NYC1-LIKE*), *PAO* Pheide *a* *OXYGENASE*, *SGR/NYE1* (*STAYGREEN*, whose role in Chl degradation is not established), *PPH* (*PHEIDE HYDROLASE*), *RCCR REDUCTASE* (*RCC RED CHL CATABOLITE*), *CAO* (*CHLOROPHYLIDE a OXYGENASE*). The branching route to tocopherol synthesis is also shown. B) RT-QPCR data obtained for *MtNYC1*. Data are the means ( $\pm$  SE) of 3 biological replicates obtained from 30 seeds of two independent harvests, each from a pool of four plants. Letters indicate significant differences compared to wild-type (ANOVA and Duncan's test for multiple comparisons). C) Expression data obtained from the transcriptome analysis. Asterisks indicate significant differences between wild-type and mutant at  $P < 0.05$  using BH-corrected values.

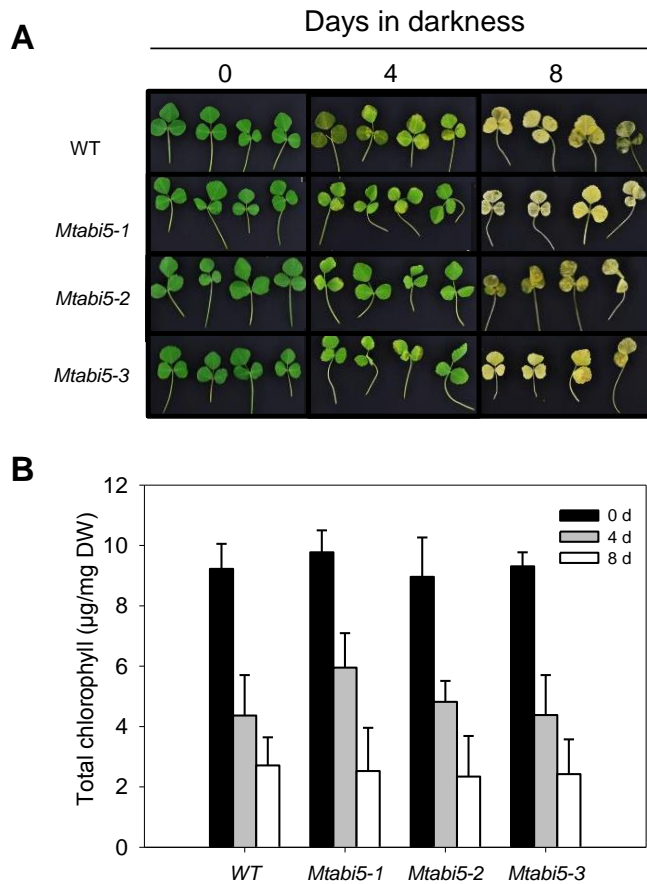

**Supplemental Figure 6. Dark-induced senescence in young seedlings of wild-type and *Mtabi5***

Photographs (A) and Chl content using spectrophotometer analysis (B). Data are means ( $\pm$  SE) of 3 replicates of four leaves from two plants. No significant differences (ANOVA  $P > 0.05$ , Supplemental dataset 3) were observed between wild-type and mutant seeds during senescence.

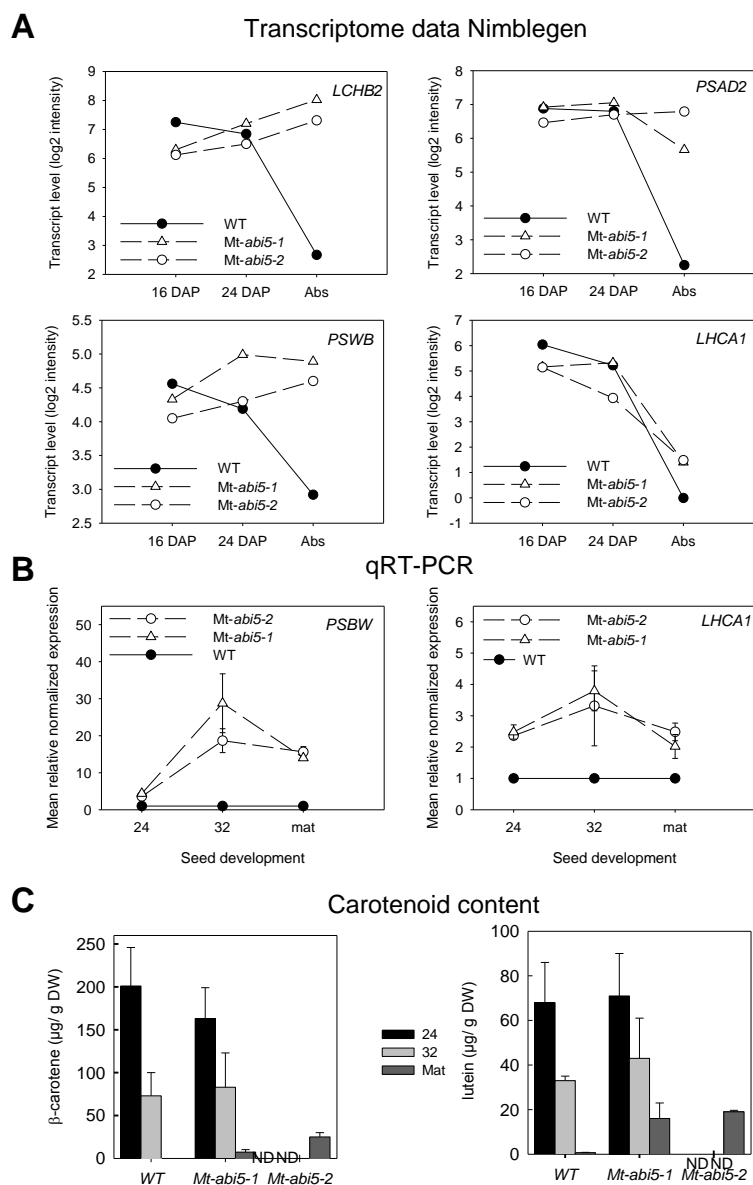

**Supplemental Figure 7. Photosynthesis-associated gene expression and carotenoid content during seed development of wild-type and *Mt-abi5* seeds.** Gene expression (*MtLHCA1*, Medtr6g033320; *MtLHCB.2*, Medtr5g097280; *MtPSAD-2*, Medtr5g006130; *MtPSWB*, Medtr1g070495) was assessed using transcriptome analysis (A) and RT-PCR (B) where data represent the means ( $\pm$ SE) of 3 biological replicates of 25 seeds each pooled from 6 plants. C)  $\beta$ -carotene (left) and lutein contents (right) at indicated time points of days after pollination, (Mat, Mature. Seeds were harvested at the point of abscission). ND, not determined.

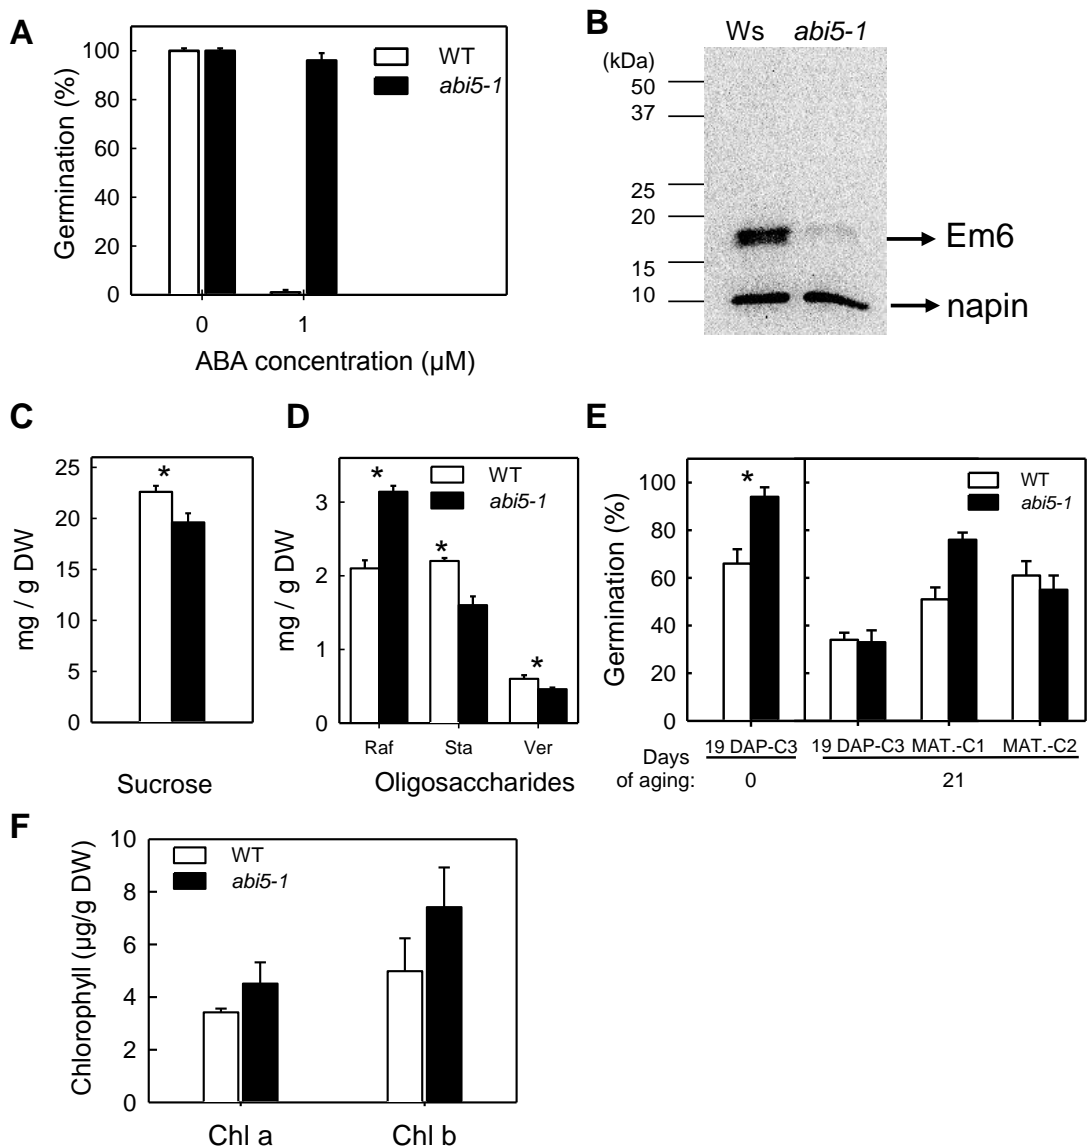

**Supplemental Figure 8. Longevity of wild-type (Wassilewskija, Ws) and *abi5-1* seeds of Arabidopsis together with sugar content and EM protein levels in dry mature seeds.**

A) ABA sensitivity. B) EM6 amount as assessed by immunoblot using an antibody against a synthetic peptide of a consensus amino-acid sequence. C-D) Sucrose and RFO contents of mature *abi5-1* seeds compared to mature wild-type seeds. Data are the means ( $\pm$  SE) of 3 replicates of 15 mg of mature seeds pooled from two plants. E) Seed dormancy and longevity of *abi5-1* mature seeds compared to mature wild-type seeds harvested at 19 DAP and at abscission (MAT). Data are the means ( $\pm$  SE) of 3 replicates of 100-200 mature seeds from 3 independent cultures (indicated as C1, C2, C3) F) Chlorophyll contents measured by spectrometry. Data are the means of ( $\pm$  SE) of 3 replicates of 15-30 mg of mature seeds pooled from four plants. When indicated, stars indicate significant difference (Student t-test,  $P > 0.05$ ) between wild-type and mutant seeds. Raf, raffinose; Sta, stachyose; Ver, verbascose.



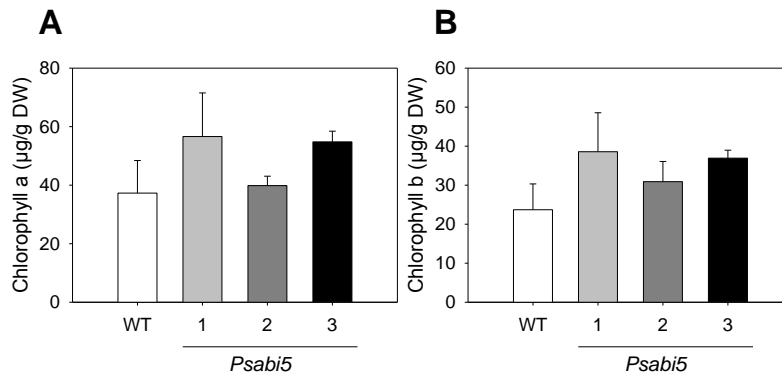

**Supplemental Figure 9. Chlorophyll contents in seed coats of mature wild-type and *Psabi5* mature seeds.**

Chl *a* (A) and Chl *b* (B) contents were measured spectrophotometrically. Data are the means ( $\pm$  SE) of two replicates of 3 seeds from a pool of 30 plants.

**Supplemental table 1. Detected polymorphisms between Jemalong J-6 and DZA315.16 in the region of ABI5 (Medtr7g104480) on LG7 (Mt4.0)**

| Position | Ref allele | Alt allele | Alt. Allele Count | Alt. Allele Frequency | Effect                  | Effect Impact | Nearest Gene  | Gene Distance | Codon Change | Amino Acid Change | Exon Rank | Transcript ID   |
|----------|------------|------------|-------------------|-----------------------|-------------------------|---------------|---------------|---------------|--------------|-------------------|-----------|-----------------|
| 42340607 | A          | G          | 10                | 0.021                 | Upstream Gene Variant   | MODIFIER      | Medtr7g104480 |               |              |                   |           | Medtr7g104480.1 |
| 42340702 | A          | G          | 20                | 0.066                 | 5 Prime UTR Variant     | MODIFIER      | Medtr7g104480 | 122           |              |                   | 1         | Medtr7g104480.1 |
| 42340937 | C          | T          | 283               | 0.508                 | Synonymous Variant      | LOW           | Medtr7g104480 | 0             | ctC/ctT      | L38               | 1         | Medtr7g104480.1 |
| 42341240 | A          | G          | 167               | 0.265                 | Synonymous Variant      | LOW           | Medtr7g104480 | 0             | caA/caG      | Q139              | 1         | Medtr7g104480.1 |
| 42341352 | A          | G          | 12                | 0.021                 | Missense Variant        | MODERATE      | Medtr7g104480 | 0             | Agg/Ggg      | R177G             | 1         | Medtr7g104480.1 |
| 42341360 | A          | G          | 279               | 0.479                 | Synonymous Variant      | LOW           | Medtr7g104480 | 0             | caA/caG      | Q179              | 1         | Medtr7g104480.1 |
| 42341399 | C          | G          | 11                | 0.024                 | Synonymous Variant      | LOW           | Medtr7g104480 | 0             | acC/acG      | T192              | 1         | Medtr7g104480.1 |
| 42341519 | C          | T          | 14                | 0.077                 | Synonymous Variant      | LOW           | Medtr7g104480 | 0             | aaC/aaT      | N232              | 1         | Medtr7g104480.1 |
| 42341660 | C          | T          | 13                | 0.028                 | Synonymous Variant      | LOW           | Medtr7g104480 | 0             | taC/taT      | Y279              | 1         | Medtr7g104480.1 |
| 42341946 | A          | T          | 13                | 0.052                 | Intron Variant          | MODIFIER      | Medtr7g104480 | 0             |              |                   | 1         | Medtr7g104480.1 |
| 42341945 | T          | G          | 13                | 0.022                 | Intron Variant          | MODIFIER      | Medtr7g104480 | 0             |              |                   | 1         | Medtr7g104480.1 |
| 42342003 | T          | C          | 12                | 0.023                 | Intron Variant          | MODIFIER      | Medtr7g104480 | 0             |              |                   | 1         | Medtr7g104480.1 |
| 42342082 | T          | A          | 72                | 0.146                 | Intron Variant          | MODIFIER      | Medtr7g104480 | 0             |              |                   | 1         | Medtr7g104480.1 |
| 42342098 | A          | G          | 11                | 0.025                 | Intron Variant          | MODIFIER      | Medtr7g104480 | 0             |              |                   | 1         | Medtr7g104480.1 |
| 42342118 | A          | G          | 72                | 0.145                 | Intron Variant          | MODIFIER      | Medtr7g104480 | 0             |              |                   | 1         | Medtr7g104480.1 |
| 42342462 | C          | G          | 21                | 0.042                 | Downstream Gene Variant | MODIFIER      | Medtr7g104490 | 951           |              |                   | 0         | Medtr7g104490.7 |
| 42342462 | C          | G          | 21                | 0.042                 | Intron Variant          | MODIFIER      | Medtr7g104480 |               |              |                   |           | Medtr7g104480.1 |
| 42343101 | G          | A          | 32                | 0.069                 | 3 Prime UTR Variant     | MODIFIER      | Medtr7g104480 | 475           |              |                   | 4         | Medtr7g104480.1 |
| 42343101 | G          | A          | 32                | 0.069                 | Downstream Gene Variant | MODIFIER      | Medtr7g104490 |               |              |                   |           | Medtr7g104490.7 |

**Supplemental table 2: Soluble sugar composition of mature pea cotyledons.**

Data (mg/g dry weight) are the means of 4 replicates of 20 cotyledons.

| <b>Genotype</b> | <b>Sucrose</b> |      | <b>Stachyose</b> |      | <b>Raffinose</b> |      | <b>Verbascose</b> |      | <b>RFO/Sucrose</b> |      |
|-----------------|----------------|------|------------------|------|------------------|------|-------------------|------|--------------------|------|
|                 | Mean           | SE   | Mean             | SE   | Mean             | SE   | Mean              | SE   | Mean               | SE   |
| Wild-type       | 19.54          | 0.84 | 13.96            | 0.73 | 3.92             | 0.28 | 33.55             | 0.63 | 2.64               | 0.09 |
| <i>Psabi5-1</i> | 29.69          | 0.55 | 17.68            | 0.52 | 7.21             | 0.24 | 22.99             | 0.63 | 1.61               | 0.04 |
| <i>Psabi5-2</i> | 27.99          | 0.98 | 15.01            | 0.68 | 6.05             | 0.37 | 23.16             | 0.63 | 1.58               | 0.07 |
| <i>Psabi5-3</i> | 35.2           | 1.1  | 18.64            | 0.2  | 7.82             | 0.48 | 18.7              | 0.38 | 1.29               | 0.04 |

**Supplemental table 3. Comparative analysis of affected phenotypes in seeds of the *abi5* mutants of *Medicago truncatula*, *Pisum sativum* and *Arabidopsis thaliana*.**

| <b>Phenotype</b>                      | <b>Mt-<i>abi5</i></b> | <b>Ps-<i>abi5</i></b> | <b>At-<i>abi5-1</i></b> |
|---------------------------------------|-----------------------|-----------------------|-------------------------|
| Dormancy                              | reduced               | NA                    | reduced (at 19 DAP)     |
| Longevity                             | reduced               | reduced               | no difference           |
| Chlorophyll retention                 | yes                   | yes                   | no                      |
| EM LEA protein/transcript abundance   | reduced               | reduced               | reduced                 |
| D-34 LEA protein/transcript abundance | reduced               | reduced               | reduced <sup>1</sup>    |
| RFO metabolism                        | affected              | affected              | affected                |
| PHANG transcripts                     | increased             | ND                    | ND                      |

*DAP*, days after pollination. *NA*, not applicable. *ND*, not determined.

<sup>1</sup> Bies-Ethève N, Gaubier-Comella P, Debures A, Lasserre E, Jobet E, Raynal M, Cooke R, Delseny M. 2008. Inventory, evolution and expression profiling diversity of the LEA (late embryogenesis abundant) protein gene family in *Arabidopsis thaliana*. *Plant Molecular Biology* 67, 107–124.

**Supplemental table 4 - List of primer combinations used for mutant selection, gene expression validation by qRT-PCR and yeast one-hybrid analysis**

| Mapping of MtABI5 |                  |                           |                              |                    | before digestion | after digestion |
|-------------------|------------------|---------------------------|------------------------------|--------------------|------------------|-----------------|
| gene              | detection method | Primer F 5'3'             | Primer R 5'3'                | restriction enzyme | size fragment    | size fragment   |
| ABI5 (AC14)       | CAPS             | CATGCGTTGACAAA<br>GGCATCT | CGAAATTCCTTGCC<br>GCTATCACAG | Hpy188I            | 497              | 419 + 78        |

  

| Mutant selection     |                 |                         |                        |
|----------------------|-----------------|-------------------------|------------------------|
| species              | Genotype        | Primer F 5'3'           | Primer R 5'3'          |
| <i>M. truncatuli</i> | <i>Mtabi5-1</i> | ATGGTGGTAAGAGAAGGTGAGAT | AGCAGCAAGATCTAGAGCCAGA |
|                      | <i>Mtabi5-2</i> | ATGGTGGTAAGAGAAGGTGAGAT | AGCAGCAAGATCTAGAGCCAGA |
|                      | <i>Mtabi5-3</i> | GGTGGAGCAGTTGGAGAACC    | TCCTCTGAACACTGCATGAGAT |
| Arabidopsis          | WS/abi5.1       | GCGCAAGCGAGACATAATGG3   | TCTGAAGACACCGGGCTTAA3  |

  

| <i>P. sativum</i> |                  |              |                                        |                                   | before digestion   | after digestion |               |
|-------------------|------------------|--------------|----------------------------------------|-----------------------------------|--------------------|-----------------|---------------|
| line              | detection method | polymorphism | Primer F 5'3'                          | Primer R 5'3'                     | restriction enzyme | size fragment   | size fragment |
| 1805/3434         | dCAPS            | C310T        | TTGTCTGTGATTCA<br>GAAGGGGATTAGT<br>TAA | TACTATTCCCAG<br>GATACCCCGAA<br>CC | Hpa I              | 481             | 451           |
|                   | CAPS             | G384A        | GAAGAAGCGATCA<br>GGAACGATGTTA          | CTGAGCCATTGT<br>AGCGGTGTTATT<br>C | Nde II             | 573             | 307 + 255     |

  

| qRT-PCR         |               |                               |                               |               |                |                |
|-----------------|---------------|-------------------------------|-------------------------------|---------------|----------------|----------------|
| Gene name       | seq_id_Mt3_5  | Forward Primer (5'-3')        | Reverse Primer (5'-3')        | PCR size (pb) | PCR efficiency | R <sup>2</sup> |
| <i>MSC27</i>    | TC85211       | GTTGAAGTAGACAT<br>TGTTGCTAAC  | AGCTGAGTCATCA<br>ACACCCTCAT   | 100           | 74.2           | 0.994          |
| <i>Actin 11</i> | Medtr2g008050 | GCTGACCGTATGAG<br>CAAGGA      | TGCCAAGATAGAC<br>CCACCAA      | 114           | 100.4          | 0.998          |
| <i>LHCA1</i>    | Medtr6g033320 | TGGCATTGTGTTGGA<br>ATCGTTGT   | ATGTTGTTGTGCCA<br>TGGATCAG    | 100           | 93.9           | 0.991          |
| <i>PSBW</i>     | Medtr1g070495 | TGGTGGATGAAAGA<br>ATGAGTACTGA | AATAGAGAGCCCA<br>GATAAAACCGAA | 111           | 100.1          | 0.995          |
| <i>NYC1</i>     | Medtr6g088500 | TCTGACAGCCGTCT<br>ATGGTTC     | CGGGAGATGCAGT<br>ATGGACA      | 107           | 102.3          | 0.999          |
| <i>LHCB2</i>    | Medtr5g097280 | ACCATGCGTCGTAC<br>TGTGAA      | TGTCCCATCCATA<br>ATCACCA      | 137           | 107.6          | 0.999          |
| <i>PSAD-2</i>   | Medtr5g006130 | GGAAGCACTGGTG<br>GATTGTT      | CACCAGTTGGCAT<br>CTCAAAG      | 100           | 89.8           | 0.992          |
| <i>SIP1</i>     | Medtr3g077280 | AACTCTTGTTTTGCC<br>TGATGGT    | AAAACACCCGTGT<br>ATTTGTTGAGA  | 141           | 81             | 0.990          |
| <i>EM1</i>      | Medtr7g069250 | TGGGAACAAAAGGA<br>GGGCAG      | AGCACGTTGTCA<br>CCAGACT       | 113           | 105.7          | 0.996          |

  

| Yeast One-Hybrid Assay                                                                               |                                                                                                                                                                                                |
|------------------------------------------------------------------------------------------------------|------------------------------------------------------------------------------------------------------------------------------------------------------------------------------------------------|
| Bait                                                                                                 | SIP1.2_F <b>AGCTT</b> AAAAAAAAAATAATAATCTTTGTT <b><u>TACGTG</u></b> TGTTAATTTAGTAAGATAAGT <b>AC</b><br>SIP1.2_R <b>TCGAG</b> TACTTATCTTACTAAAATTAACACACGTAACAAAGATTATTATTTTTTTT <b>A</b>       |
| mutated form                                                                                         | SIP1.2 mut_F <b>AGCTT</b> AAAAAAAAAATAATAATCTTTGTT <b><u>TTTCAC</u></b> TGTTAATTTAGTAAGATAAGT <b>AC</b><br>SIP1.2 mut_R <b>TCGAG</b> TACTTATCTTACTAAAATTAACAGTGAACAAAGATTATTATTTTTTTT <b>A</b> |
| Bold red, adapters for HindIII and XhoI; bold underlined, ABRE element; italics, mutated nucleotides |                                                                                                                                                                                                |
| Prey                                                                                                 | MtABI5PREY_F GCGCCATATG <b>ATG</b> GTTGGTAAGAGAAGGTGAGAT<br>MtABI5PREY_R:TATACTCGAG <b>TCAC</b> AGATGACAACCTTGATTCC<br>Bold: start and stop codon of Mt-ABI5                                   |
